# Supplementary material
Source: publisher site journal article supplement (https://www.dovepress.com/article/466286)
Supplement: Supplementary file 1 [file get_supplementary_file.php]

**Table S1.** Primers used for real-time PCR amplifications

| **Gene** | **GenBank accession no** | **Oligonucleotide sequence** | **Annealing temperature** | **Size (bp)** | **Source** |
| --- | --- | --- | --- | --- | --- |
| NF-κB | [AF079314.2](https://www.ncbi.nlm.nih.gov/entrez/viewer.fcgi?db=nucleotide&id=1125143075) | f5,- TGGACGATCTGTTTCCCCTC -3,  r5,- CCCTCGCACTTGTAACGGAA-3, | 59 ℃ | 118 | Current study |
| IL-1β | NM_031512.2 | f5,- GACTTCACCATGGAACCCGT -3,  r5,- GGAGACTGCCCATTCTCGAC -3, | 58 ℃ | 104 | Current study |
| SOD | X05634.1 | f5,- GAAGGCCGTGTGCGTGCTGA -3,  r5,- CCTTCAGTTAATCCTGTAATC-3, | 58 ℃ | 117 | Current study |
| NRF2 | NM_031144.3 | f5, - GTCCACCCGCGAGTACAACCT-3,  r5, - GGAGCCGTTGTCGACGACGA-3, | 60 ℃ | 119 | Current study |
| KIM-1 | [AF035963.1](https://www.ncbi.nlm.nih.gov/entrez/viewer.fcgi?db=nucleotide&id=2665891) | f5,- AGACAGAGTGTGCTGAGTGC-3,  r5, -ACAGAGCCTGGAAGAAGCAG-3, | 59 ℃ | 121 | Current study |
| NGAL | NM_130741.1 | f5,- CAAGTGGCCGACACTGACTA-3,  r5, -TTCAGTTCATCGGACAGCCC-3, | 59 ℃ | 122 | Current study |
| Desmin | NM_022531.2 | f5,- GACCATTGAGACCCGGGATG-3,  r5, - CTGGGTGTGACATCCGAGAG-3, | 60 ℃ | 145 | Current study |
| Vimentin | NM_031140.1 | f5,- TCCTTCGAAGCCATGTCCAC-3,  r5, - GGACGAGGAATAGAGGCTGC-3, | 58 ℃ | 180 | Current study |
| Nestin | AF538924.1 | f5,-AATGCCAGAGGTGACAGAGC-3,  r5, -TTGGGTCCTCTAGCCCTACC-3, | 58 ℃ | 137 | Current study |
| β-Actin | NM_031144.3 | f5,- GGCATGTGCAAGGCCGGCTT -3,  r5,- TAGGAGTCCTTCTGACCCATA -3, | 58 ℃ | 116 | Current study |
